# Supplementary material
Source: PubMed Central journal article supplement (PMC3582805)
Supplement: NIHMS429477-supplement-supplement_1.pdf [file NIHMS429477-supplement-supplement_1.pdf]

**Supplementary Table 1: Description of weakly or non- replicable parameters.**

| Parameter                                                 | # of studies | Association Described |      |     |
|-----------------------------------------------------------|--------------|-----------------------|------|-----|
|                                                           |              | POS.                  | NEG. | NS* |
| <b>Cell Composition</b>                                   |              |                       |      |     |
| CD3+ (28, 45, 50, 90)                                     | 4            |                       |      |     |
| CD8+ (28, 37, 45, 47, 48, 50, 92)                         | 7            |                       |      |     |
| Lymphocytes (8, 9, 18, 26-28, 33, 34, 40, 50, 89, 94, 95) | 13           |                       |      |     |
| Eosinophils (8-10, 26, 27, 40, 89)                        | 7            |                       |      |     |
| Macrophages (5, 8, 16-18, 26, 33, 40, 47, 62, 88, 89)     | 11           |                       |      |     |
| <b>Cytokines, Chemokines, Growth Factors</b>              |              |                       |      |     |
| IL-1RA (8, 63)                                            | 2            |                       |      |     |
| IL-1b (8, 29, 57, 59)                                     | 4            |                       |      |     |
| IL-2 (29, 47, 57, 99)                                     | 4            |                       |      |     |
| IL-12 (56, 57, 59, 75)                                    | 3            |                       |      |     |
| IL-13 (63, 100)                                           | 2            |                       |      |     |
| IL-17 (29, 59, 63)                                        | 3            |                       |      |     |
| IL-23 (29, 59)                                            | 2            |                       |      |     |
| TGF-b (8, 12, 17, 29, 47, 57, 59, 98, 100, 102-105)       | 12           |                       |      |     |
| HGF (47, 59, 104)                                         | 2            |                       |      |     |
| GM-CSF (57, 59)                                           | 2            |                       |      |     |
| PDGF (13, 59, 103)                                        | 3            |                       |      |     |
| VEGF (59, 90, 98, 106)                                    | 4            |                       |      |     |
| CCL19 (46, 107)                                           | 2            |                       |      |     |
| CCL22 (45, 46, 107)                                       | 2            |                       |      |     |

| Parameter                                     | # of studies | Association Described |      |     |
|-----------------------------------------------|--------------|-----------------------|------|-----|
|                                               |              | POS.                  | NEG. | NS* |
| <b>Innate Immune Components</b>               |              |                       |      |     |
| B-Defensins (5, 67, 91)                       | 3            |                       |      |     |
| Eosinophil Cationic Protein (25, 26, 93)      | 3            |                       |      |     |
| Mannose -Binding Lectin (96, 97)              | 2            |                       |      |     |
| C-reactive Protein (31, 75, 98)               | 3            |                       |      |     |
| Complement C3 (75, 76)                        | 2            |                       |      |     |
| Lysozyme (69, 91)                             | 2            |                       |      |     |
| <b>Matrix Metalloproteinases</b>              |              |                       |      |     |
| MMP-2 (6, 73, 82)                             | 3            |                       |      |     |
| MMP-8 (59, 82)                                | 2            |                       |      |     |
| TIMP-1 (6, 15, 59, 82)                        | 4            |                       |      |     |
| <b>Oxidative Stress</b>                       |              |                       |      |     |
| Peroxiredoxin II (75, 76)                     | 2            |                       |      |     |
| Iron (22, 101)                                | 2            |                       |      |     |
| Lipid Peroxidation (74, 84)                   | 2            |                       |      |     |
| <b>Miscellaneous</b>                          |              |                       |      |     |
| $\alpha$ 1-Acid glycoprotein 2 (75, 76)       | 2            |                       |      |     |
| $\alpha$ 2-HS-glycoprotein (75, 76)           | 2            |                       |      |     |
| Apolipoprotein A1 (75, 76)                    | 2            |                       |      |     |
| Leucine-rich $\alpha$ 2 glycoprotein (75, 76) | 2            |                       |      |     |
| $\alpha$ 1-beta glycoprotein (75, 76)         | 2            |                       |      |     |
| $\alpha$ 1 anti-chymotrypsin (75, 76)         | 2            |                       |      |     |
| Haptoglobin (75, 76)                          | 2            |                       |      |     |
| Albumin (25, 26)                              | 2            |                       |      |     |
| Fibronectin (57, 59)                          | 2            |                       |      |     |
| Heat Shock Protein 70 (76, 108)               | 2            |                       |      |     |

**Supplementary Table 2: Description of parameters only examined in one study.**

| Parameter                                    | Association Described |      |     |
|----------------------------------------------|-----------------------|------|-----|
|                                              | POS.                  | NEG. | NS* |
| <b>Cell Composition</b>                      |                       |      |     |
| CD4+HLA-DR+ (28)                             |                       |      |     |
| CD8+HLA-DR+ (28)                             |                       |      |     |
| CD4+CD45+ (28)                               |                       |      |     |
| CD8+CD45+ (28)                               |                       |      |     |
| CD4+CD25+ (28)                               |                       |      |     |
| CD19+ (28)                                   |                       |      |     |
| NK Cells (28)                                |                       |      |     |
| <b>Cytokines, Chemokines, Growth Factors</b> |                       |      |     |
| IL-2R (16)                                   |                       |      |     |
| IL-5 (57)                                    |                       |      |     |
| IL-15 (11)                                   |                       |      |     |
| IL-16 (16)                                   |                       |      |     |
| GRO-a (59)                                   |                       |      |     |
| COX 2 (59)                                   |                       |      |     |
| FGF-b (59)                                   |                       |      |     |
| EGF (59)                                     |                       |      |     |
| PIGF (59)                                    |                       |      |     |
| SDF-1 (59)                                   |                       |      |     |
| RAGE (59)                                    |                       |      |     |
| EGF (59)                                     |                       |      |     |
| PIGF (59)                                    |                       |      |     |
| CCL3 (107)                                   |                       |      |     |
| CCL20 (107)                                  |                       |      |     |
| CCL21 (46)                                   |                       |      |     |
| CCL26 (107)                                  |                       |      |     |
| ITAC/CXCL11 (65)                             |                       |      |     |
| sICAM-1 (23)                                 |                       |      |     |
| VCAM-1 (23)                                  |                       |      |     |
| IGF-1 (109)                                  |                       |      |     |
| IGFBP-2 (109)                                |                       |      |     |
| IGFBP-3 (109)                                |                       |      |     |
| T cell granzyme B (110)                      |                       |      |     |
| <b>Innate Immune Components</b>              |                       |      |     |
| SP-B (52)                                    |                       |      |     |
| SP-C (59)                                    |                       |      |     |
| SP-D (74)                                    |                       |      |     |
| Alpha-1-Antitrypsin (14)                     |                       |      |     |
| Elafin (5)                                   |                       |      |     |
| Serine Protease (73)                         |                       |      |     |

| Parameter                                | Association Described |      |     |
|------------------------------------------|-----------------------|------|-----|
|                                          | POS.                  | NEG. | NS* |
| <b>Miscellaneous</b>                     |                       |      |     |
| Histatin (68)                            |                       |      |     |
| Calgranulin A (68)                       |                       |      |     |
| Phosphatidylcholine (74)                 |                       |      |     |
| Phosphatidylglycerol (PG) (74)           |                       |      |     |
| Phosphatidylinositol (74)                |                       |      |     |
| Sphingomyelin (SM) (74)                  |                       |      |     |
| Lysophosphatidylcholine (74)             |                       |      |     |
| Osteopontin (59)                         |                       |      |     |
| Ascorbate (26)                           |                       |      |     |
| Urate (26)                               |                       |      |     |
| Heat Shock Protein 27 (108)              |                       |      |     |
| Heat Shock Protein 60 (108)              |                       |      |     |
| Anti-Heat Shock Protein 27 (108)         |                       |      |     |
| Anti-Heat Shock Protein 70 (108)         |                       |      |     |
| Mucin-5AC (76)                           |                       |      |     |
| Mucin-16 (76)                            |                       |      |     |
| Mucin-1 Isoform (76)                     |                       |      |     |
| Mucin-4 Isoform (76)                     |                       |      |     |
| Annexin A3 (76)                          |                       |      |     |
| Myeloblastin (76)                        |                       |      |     |
| Prominin-1 (76)                          |                       |      |     |
| Olfactomedin-4 (76)                      |                       |      |     |
| Calmodulin (76)                          |                       |      |     |
| IgGfc binding protein (76)               |                       |      |     |
| Alpha-Actinin-1 (76)                     |                       |      |     |
| Catalase (76)                            |                       |      |     |
| Transcobalamin-1 (76)                    |                       |      |     |
| Carbonic Anhydrase 1 (76)                |                       |      |     |
| Dipeptidyl Peptidase 1 (76)              |                       |      |     |
| Cathepsin B (76)                         |                       |      |     |
| Tetraspanin-1 (76)                       |                       |      |     |
| Peptidoglycan recognition protein 1 (76) |                       |      |     |
| Coronin-1A (76)                          |                       |      |     |
| Desmoglein (76)                          |                       |      |     |
| Glutathione S-transferase A1 (76)        |                       |      |     |
| Glucose-6-Phosphate Isomerase (76)       |                       |      |     |
| Histone H2B, H4 (76)                     |                       |      |     |
| Protein S100 A9,A10,A12,P (76)           |                       |      |     |
| Trypsin- 1 (76)                          |                       |      |     |

|                                     |  |  |  |
|-------------------------------------|--|--|--|
| Cathelicidin/hCA/ LL-37 (5)         |  |  |  |
| Neutrophil Collagenase (76)         |  |  |  |
| Chymotrypsin-like elastase 3A (76)  |  |  |  |
| Gelatinase-Associated Lipcalin (76) |  |  |  |
| Complement C9 (76)                  |  |  |  |
| Complement C5 (76)                  |  |  |  |
| Complement C8 (76)                  |  |  |  |
| Complement C7 (76)                  |  |  |  |
| <b>Oxidative Stress</b>             |  |  |  |
| Thioredoxin (76)                    |  |  |  |
| Metallothionein (112)               |  |  |  |

|                                        |  |  |  |
|----------------------------------------|--|--|--|
| Nitrogen Dioxide (111)                 |  |  |  |
| Inter-alpha Trypsin Inhibitor H1 (76)  |  |  |  |
| Carboxypeptidase A1, B (76)            |  |  |  |
| Pancreatic Triacylglycerol Lipase (76) |  |  |  |
| Carboxyl Ester Lipase Precursor (76)   |  |  |  |
| Chymotrypsinogen B, B2 (76)            |  |  |  |
| chymotrypsin-like elastase 2A, 3B (76) |  |  |  |
| Moesin (76)                            |  |  |  |
| N-acetylmuramoyl alanine amidase (76)  |  |  |  |
| Lithostathine-1-alpha (76)             |  |  |  |
| Protease serine 2B (76)                |  |  |  |
| Fibulin-1 B (76)                       |  |  |  |
| 40S, 60S Ribosomal Protein (76)        |  |  |  |
| UV Excision Repair Protein RAD23 (76)  |  |  |  |
| Serum Amyloid Protein A (76)           |  |  |  |

\*Non-significant

**Supplemental Text:**

In addition, BAL parameters that were moderately replicable yet did not have a significant association with BOS include: CD4+ T-cells, IL-4, IL-10, INF $\gamma$ , TNF $\alpha$ , CCL17, and TIMP-2. (6, 8, 28, 38, 45-47, 50, 56, 57, 59, 62, 82, 88, 99, 100, 107)

**References:**
